# Supplementary material
Source: PubMed Central journal article supplement (PMC3904773)
Supplement: NIHMS440656-supplement-Supplementary_data.pdf [file NIHMS440656-supplement-Supplementary_data.pdf]

## Supplementary Information

| Supplementary Table S1. Somatic mutations in CCK2R found in cancers |                                  |                   |
|---------------------------------------------------------------------|----------------------------------|-------------------|
| <b>Protein Change</b>                                               | <b>Cancer Subtype</b>            | <b>References</b> |
| *E151A                                                              | Genetically engineered mutation  | (1-5)             |
| R243C                                                               | Colon cancer                     | -                 |
| G267V                                                               | NSCLC (squamous)                 | (6)               |
| R278H                                                               | NSCLC (adenocarcinoma)           | (6)               |
| V287F                                                               | Colon cancer                     | (7)               |
| #i4sv                                                               | Colorectal and pancreatic cancer | (8-10)            |
| A383S                                                               | Gastric cancer                   | -                 |
| R395H                                                               | Colon cancer                     | -                 |
| R396C                                                               | Colon cancer                     | -                 |
| C405F                                                               | NSCLC (adenocarcinoma)           | (6)               |
| A406T                                                               | Colon cancer                     | -                 |
| A406V                                                               | Gastric cancer                   | -                 |
| A431D                                                               | NSCLC (adenocarcinoma)           | (6)               |

# Supplementary Figure 1

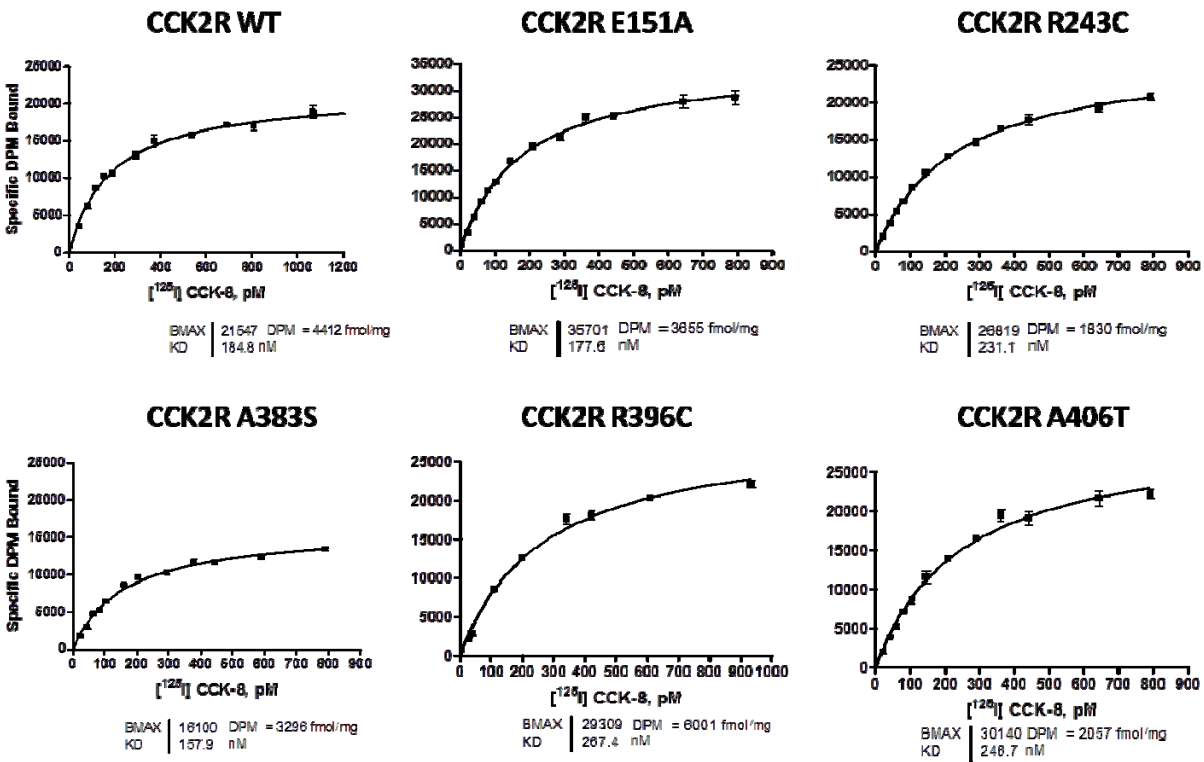

Supplementary Table S2. Functional activity of CCK2R variants

| Variant | IP-1 | Ca <sup>2+</sup> flux <sup>#</sup> | cAMP | pERK | pAkt |
|---------|------|------------------------------------|------|------|------|
| WT      | 10   | 20                                 | 3    | 27   | 8    |
| E151A   | 4    | 140                                | 2    | 30   | -    |
| R243C   | 3    | 50                                 | 1    | 30   | 29   |
| A383S   | 7    | 30                                 | 5    | 15   | 3    |
| R396C   | 9    | 120                                | 1    | 27   | 18   |
| A406T   | 10   | 20                                 | 1    | 27   | 20   |

**Supplementary Table S1.** Somatic mutations in CCK2R found in cancers. <sup>#</sup>All mutations are in the coding region and are missense excluding i4sv which is an aberrantly spliced transcript. \*E151A is a synthetic constitutively active published mutation that promotes tumorigenesis.

**Supplementary Figure 1.** Saturation binding experiments to determine receptor expression level (Bmax) of HEK293 CCK2R stable clones. Data were analyzed using Prism 4.03 and the nonlinear regression (curve fit) equation “one site binding hyperbola” to determine Kd and Bmax.

**Supplementary Table S2.** Functional activity of CCK2R variants in second messenger and downstream pathway activation assays. Agonist potency of HEK293 stable clones at CCK2R WT, CCK2R E151A and CCK2R variants (R243C, A383S, R396C and A406T) in the following assays: IP-1, Ca<sup>2+</sup> flux, cAMP, pERK and pAkt. #All values displayed are the EC<sub>50</sub> at each receptor expressed in nM, excluding Ca<sup>2+</sup> flux which is pM. All experiments conducted with CCK-8 except Ca<sup>2+</sup> flux where gastrin was used.

### **Supplementary Materials and Methods**

#### ***Membrane preparation and radioligand binding assay***

HEK membranes were prepared from HEK293 cells CCK2R stable clones (or untransfected cells). Cells were cultured, washed 1x with 10 ml PBS (Ca<sup>2+</sup>/Mg<sup>2+</sup> -free), then harvested by trituration in PBS and centrifuged at 100 x g for 5 min. Supernatant was aspirated and dry pellets were frozen in liquid N<sub>2</sub> and stored at -80°C. To prepare membranes, pellets were thawed on ice and homogenized in ice-cold TEE homogenization buffer [25 mM Tris (pH 7.5), 5 mM EDTA, 5 mM EGTA, cOmplete Protease Inhibitors, EDTA-free (Roche)] in a glass dounce homogenizer. Homogenate was centrifuged at 4°C, 250 x g, 10 min and supernatant collected. Pellets were re-homogenized in TEE and centrifuged again. Supernatants were pooled and centrifuged at 4°C, 47,000 x g for 40 min. Supernatants were discarded and membrane pellets were washed 1x in ice-cold TEE by homogenization in glass dounce, then centrifuged again.

Membrane pellets were resuspended in ice-cold binding buffer [50 mM Hepes (pH 7.4), 5 mM MgCl<sub>2</sub>, 0.2 mg/ml bacitracin, cOmplete Protease Inhibitors, EDTA-free) to a concentration of 1-2 mg protein/ml. Protein concentrations were determined using Pierce BCA protein assay kit. Membrane preparations were aliquoted, snap frozen in liquid N<sub>2</sub>, and stored at -80°C.

Saturation binding experiments to determine receptor expression level (B<sub>max</sub>) of HEK293 CCK2R stable clones were performed in 96-well plates. 1-5 µg of membrane protein were incubated in binding buffer plus 0.02% BSA with increasing concentrations of [<sup>125</sup>I] CCK-8 (20 pM to 800 pM) in the presence or absence of 10 µM JB95008 (CCK2R antagonist). Non-specific binding (determined in the presence of JB95008) was < 10% of total binding. Incubation at RT for 5 h was terminated by harvesting assay wells onto 96-well GF-C filter plates using a Unifilter Harvester (Perkin Elmer) followed by 3-40 ml washes of ice-cold wash buffer (50 mM Tris pH 7.5, 0.2% BSA). Plates were dried and backsealed, and Microscint 20 was added before topsealing and reading plates in a TopCount scintillation counter (Perkin Elmer). Aliquots of radioligand dilutions were counted on a gamma counter to determine dpm added/well. Total binding was always less than 10% of dpm added. Data were analyzed using Prism 4.03 and the nonlinear regression (curve fit) equation “one site binding hyperbola” to determine K<sub>d</sub> and B<sub>max</sub>.

### ***IP-1 assay***

IP-1 accumulation was measured using the IP-One HTRF kit according to the manufacturer's instructions. HEK293 CCK2R stable clones (or untransfected cells) were seeded in white, clear-bottom, 96-half-well PDL-coated plates at 40,000 cells/well, and

cultured O/N. To initiate the assay, media was removed and cells were stimulated for 60 min at 37°C, 5% CO<sub>2</sub> with CCK-8 or gastrin in Stimulation Buffer (10 mM Hepes, 1 mM CaCl<sub>2</sub>, 0.5 mM MgCl<sub>2</sub>, 4.2 mM KCl, 146 mM NaCl, 5.5 mM glucose, 50 mM LiCl, pH 7.4). Dilutions of an IP-1 standard were prepared and added to empty wells for a standard curve. At the end of the stimulation period, d2 conjugated IP-1 and anti-IP-1 antibody labeled with Lumi4-Tb cryptate, both diluted in Lysis Buffer from the kit, were added to cells and standard wells. Plates were incubated at RT for 3-15 h and then read on an EnVision® (Perkin Elmer) multilabel plate reader with excitation at 340 nm and emission at 665 and 620 nm. Assay signal was expressed as the fluorescence ratio (665 nm / 620 nm). A standard curve was constructed plotting fluorescence ratio v. IP-1 concentration. IP-1 concentrations of unknowns were interpolated from the standard curve. EC<sub>50</sub> values for concentration response curves were determined using Prism 4.03 and the nonlinear regression (curve fit) equation “sigmoidal dose-response (variable slope)”.

### ***cAMP assay***

cAMP accumulation was measured using the cAMP dynamic 2 kit according to the manufacturer's instructions. HEK293 CCK2R stable clones (or untransfected cells) were seeded in white, clear-bottom, 96-half-well PDL-coated plates at 40,000 cells/well, and cultured O/N. To initiate the assay, media was removed from wells and replaced with Stimulation Buffer (DMEM w/o phenol red, 500 µM isobutylmethylxanthine, 0.1% BSA) and incubated at 37°C, 5% CO<sub>2</sub> for 15 min. CCK-8 or gastrin diluted in Stimulation Buffer were added to the wells and plates were incubated at 37°C, 5% CO<sub>2</sub> for 30 min for cAMP accumulation. Dilutions of cAMP standard were made and added to empty

wells for creation of a standard curve. At the end of the stimulation period, d2 conjugated cAMP and anti-cAMP antibody labeled with  $\text{Eu}^{3+}$  cryptate, both diluted in Lysis Buffer from the kit, were added to cells and standard wells. Plates were incubated at RT for 3-15 h and then read on an EnVision® (Perkin Elmer) multilabel plate reader with excitation at 320 nm and emission at 665 and 620 nm. Assay signal was expressed as the fluorescence ratio (665 nm / 620 nm). A standard curve was constructed plotting fluorescence ratio v. cAMP concentration. cAMP concentrations of unknowns were interpolated from the standard curve.  $\text{EC}_{50}$  values for concentration response curves were determined using GraphPad Prism and the nonlinear regression (curve fit) equation “sigmoidal dose-response (variable slope)”.

### **SureFire® assays**

The combined levels of phosphorylated ERK1/2 (Thr202/Tyr204) or phosphorylated Akt 1/2 (Ser473) were measured using the AlphaScreen® SureFire® p-ERK1/2 or p-Akt 1/2 Assay (PerkinElmer), respectively. HEK293 cells were plated and transfected as described above. 48 h post-transfection, cells were starved in serum-free DMEM for 6 h prior to agonist stimulation. The reaction was then terminated by removal of the media followed by lysis using the proprietary lysis buffer supplied with the SureFire® kit. Samples were processed according to the manufacturer’s instructions, and samples were read on an EnVision® plate reader (PerkinElmer).

### **Supplementary References**

1. Alewijnse AE, Timmerman H, Jacobs EH, *et al.* The effect of mutations in the DRY motif on the constitutive activity and structural instability of the histamine H(2) receptor. *Molecular pharmacology* 2000;57(5):890-8.

2. Cohen GB, Yang T, Robinson PR, Oprian DD. Constitutive activation of opsin: influence of charge at position 134 and size at position 296. *Biochemistry* 1993;32(23):6111-5.
3. Morin D, Cotte N, Balestre MN, *et al.* The D136A mutation of the V2 vasopressin receptor induces a constitutive activity which permits discrimination between antagonists with partial agonist and inverse agonist activities. *FEBS letters* 1998;441(3):470-5.
4. Rasmussen SG, Jensen AD, Liapakis G, Ghanouni P, Javitch JA, Gether U. Mutation of a highly conserved aspartic acid in the beta2 adrenergic receptor: constitutive activation, structural instability, and conformational rearrangement of transmembrane segment 6. *Molecular pharmacology* 1999;56(1):175-84.
5. Scheer A, Fanelli F, Costa T, De Benedetti PG, Cotecchia S. Constitutively active mutants of the alpha 1B-adrenergic receptor: role of highly conserved polar amino acids in receptor activation. *The EMBO journal* 1996;15(14):3566-78.
6. Kan Z, Jaiswal BS, Stinson J, *et al.* Diverse somatic mutation patterns and pathway alterations in human cancers. *Nature*;466(7308):869-73.
7. Schmitz F, Otte JM, Stechele HU, *et al.* CCK-B/gastrin receptors in human colorectal cancer. *European journal of clinical investigation* 2001;31(9):812-20.
8. Ding WQ, Kuntz SM, Miller LJ. A misspliced form of the cholecystokinin-B/gastrin receptor in pancreatic carcinoma: role of reduced sellular U2AF35 and a suboptimal 3'-splicing site leading to retention of the fourth intron. *Cancer research* 2002;62(3):947-52.

9. Hellmich MR, Rui XL, Hellmich HL, Fleming RY, Evers BM, Townsend CM, Jr. Human colorectal cancers express a constitutively active cholecystokinin-B/gastrin receptor that stimulates cell growth. *The Journal of biological chemistry* 2000;275(41):32122-8.
10. Smith JP, Verderame MF, McLaughlin P, Martenis M, Ballard E, Zagon IS. Characterization of the CCK-C (cancer) receptor in human pancreatic cancer. *International journal of molecular medicine* 2002;10(6):689-94.
